# Supplementary material for: Synthesis of highly symmetrical BiOI single-crystal nanosheets and their {001} facet-dependent photoactivity
Source: Royal Society of Chemistry journal article supplement (doi:10.1039/c1jm11005e), 2011-01-01
Supplement: c1jm11005e.pdf [file c1jm11005e.pdf]

## Supporting Information

### Synthesis of highly symmetrical BiOI single-crystal nanosheets and their {001} facet-dependent photoactivity

*Liqun Ye, Lihong Tian, Tianyou Peng and Ling Zan\**

\* College of Chemistry and Molecular Science, Wuhan University, Wuhan, 430072, China.

Fax: 86 27 8737 8727; Tel: 86 27 6875 2919; E-mail: irlab@whu.edu.cn

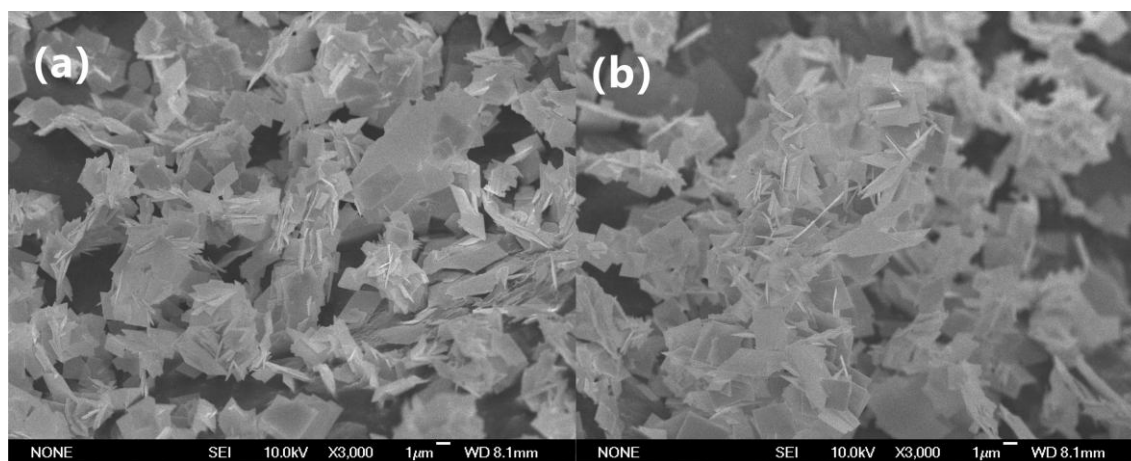

**Fig. S1** (a) FESEM image of BiOI SCN-4; and (b) FESEM image of BiOI SCN-6.

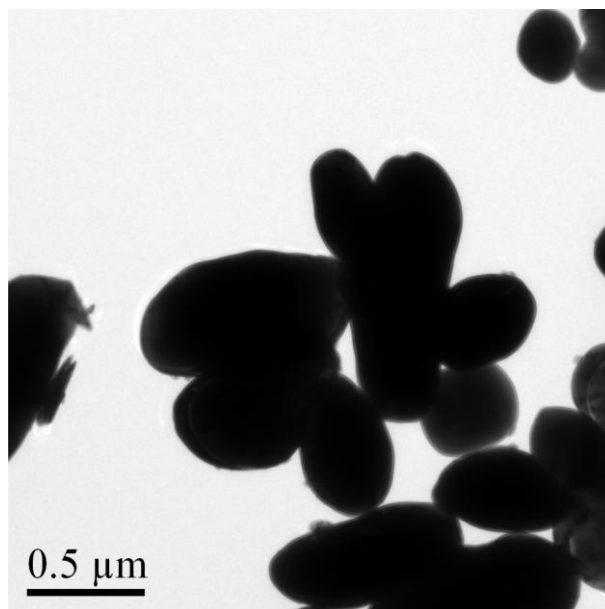

**Fig. S2** TEM image of irregular BiOI.

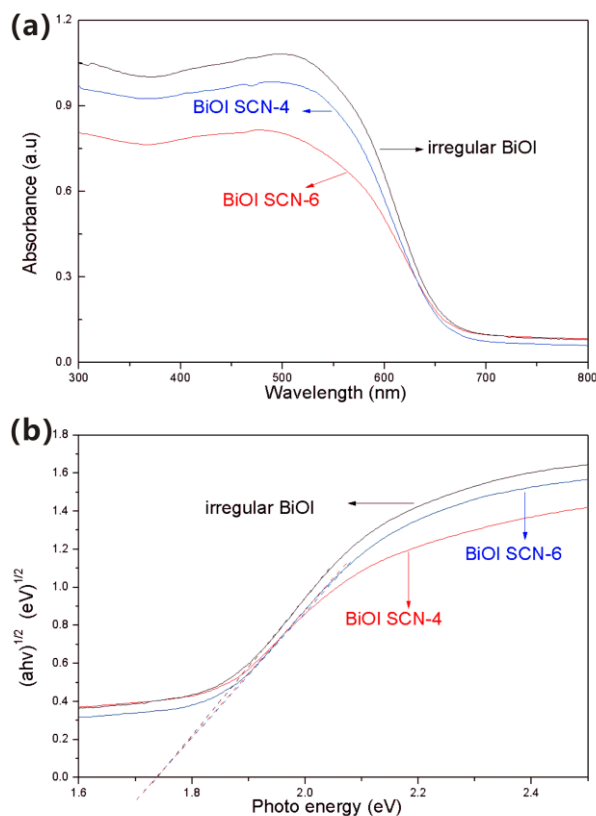

**Fig. S3** DRS spectra (a) and Plots of  $(\alpha h\nu)^{1/2}$  vs photon energy ( $h\nu$ ) (b) of irregular BiOI, BiOI SCN-4 and BiOI SCN-6.

As a semiconductor, the optical absorption near the band edge follows the equation  $\alpha h\nu = A(h\nu - E_g)^{n/2}$ , where  $\alpha$ ,  $\nu$ ,  $E_g$ , and  $A$  are the absorption coefficient, light frequency, band gap energy, and a constant, respectively. For BiOI, the value of  $n$  is 4 for the indirect transition.<sup>22</sup>

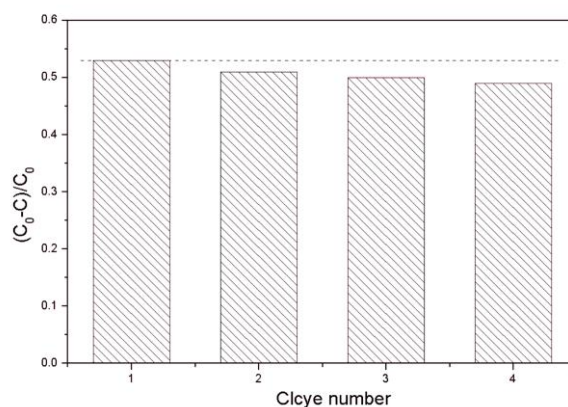

**Fig. S4** Cycle runs in the photocatalytic degradation of RhB in the presence of BiOI SCNs under visible light irradiation for 1 h.

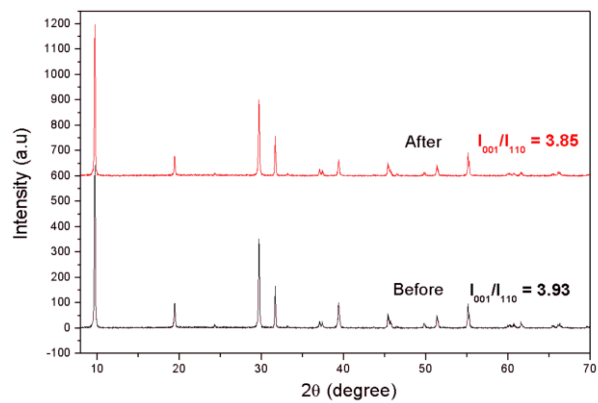

**Fig. S5** XRD pattern of BiOI SCN-4 before and after photocatalytic reaction.
